# Supplementary material
Source: PubMed Central journal article supplement (PMC2459285)

## Supplemental Figure Legends

**Supplemental Fig. 1. Pharmacological activation by resveratrol stimulates AMPK signaling in a dose-dependent manner in HepG2 cells.** **A.** Activation of SIRT1 by resveratrol dose-dependently stimulates AMPK and ACC phosphorylation. Human HepG2 hepatocytes were quiesced in serum-free DMEM overnight and incubated with resveratrol (10-100  $\mu$ M) for 1 h. Representative immunoblotting analysis with antibodies against AMPK $\alpha$  phosphorylated at Thr172 (pAMPK) and ACC phosphorylated at Ser79 in ACC1 (Ser221 in ACC2, pACC), and total AMPK $\alpha$ 1 or  $\alpha$ 2 and ACC for loading controls, respectively, is shown. **B.** Densitometric quantification of the phosphorylation of AMPK and ACC is shown. The levels of phosphorylated AMPK or ACC (two bands) were normalized to the levels of total AMPK $\alpha$  or ACC (two bands), respectively, and expressed as relative phosphorylation. **C and D.** Resveratrol prevents the inhibition of ACC phosphorylation caused by high glucose. \* $P$ <0.05 vs normal glucose; # $P$ <0.05 vs high glucose alone, mean  $\pm$  S.E. (n=3).

**Supplemental Fig. 2. Adenovirus-mediated knockdown of SIRT1 inhibits resveratrol-induced AMPK phosphorylation in HepG2 Cells.** HepG2 cells were infected with adenovirus expressing either control shRNA or *SIRT1* shRNA, followed by treatment with resveratrol (50  $\mu$ M, 1 h). **A.** Representative immunoblots for suppression of endogenous SIRT1 and phosphorylation of AMPK are shown. **B.** Knockdown of SIRT1 by Ad-SIRT1 shRNA markedly attenuates resveratrol-stimulated AMPK phosphorylation. \* $P$ <0.05 vs untreated in cells expressing control shRNA, # $P$ <0.05 vs resveratrol treatment in cells expressing control shRNA, mean  $\pm$  S.E. (n=3).

**Supplemental Fig. 3. Polyphenols-stimulated LKB1/AMPK signaling is independent of CaMKK $\beta$ .** **A-B.** Pharmacological inhibition of CaMKK by STO-609 reduces the basal AMPK but does not affect LKB-mediated activation of AMPK in the absence and presence of resveratrol in HeLa cells. Cells expressing either Ad-GFP or Ad-FLAG-LKB1 were pretreated without or with STO-609 (20  $\mu$ M) for 30 min and treated without or with resveratrol (50  $\mu$ M) for an additional 1 h as indicated. Immunoblots show the endogenous CaMKK $\beta$  (~65 kDa) in HeLa cells and no significant change in the expression of SIRT1, CaMKK $\beta$  and AMPK throughout treatments. \* $P$ <0.05, vs Ad-GFP alone; # $P$ <0.05, vs Ad-FLAG-LKB1 alone, mean  $\pm$  S.E. (n=3). **C-E.** Increased phosphorylation of LKB1 and AMPK in response to polyphenols is not significantly affected by STO-609 in HepG2 cells that may express LKB1, CaMKK $\alpha$  and CaMKK $\beta$ . Phosphorylation of LKB1, AMPK and ACC was shown in cells preincubated with STO-609 (10  $\mu$ M) for 30 min and then treated with S17834 (10  $\mu$ M) for an additional 1 h as indicated. \* $P$ <0.05, vs control; # $P$ <0.05, vs STO-609 alone, mean  $\pm$  S.E. (n=3).

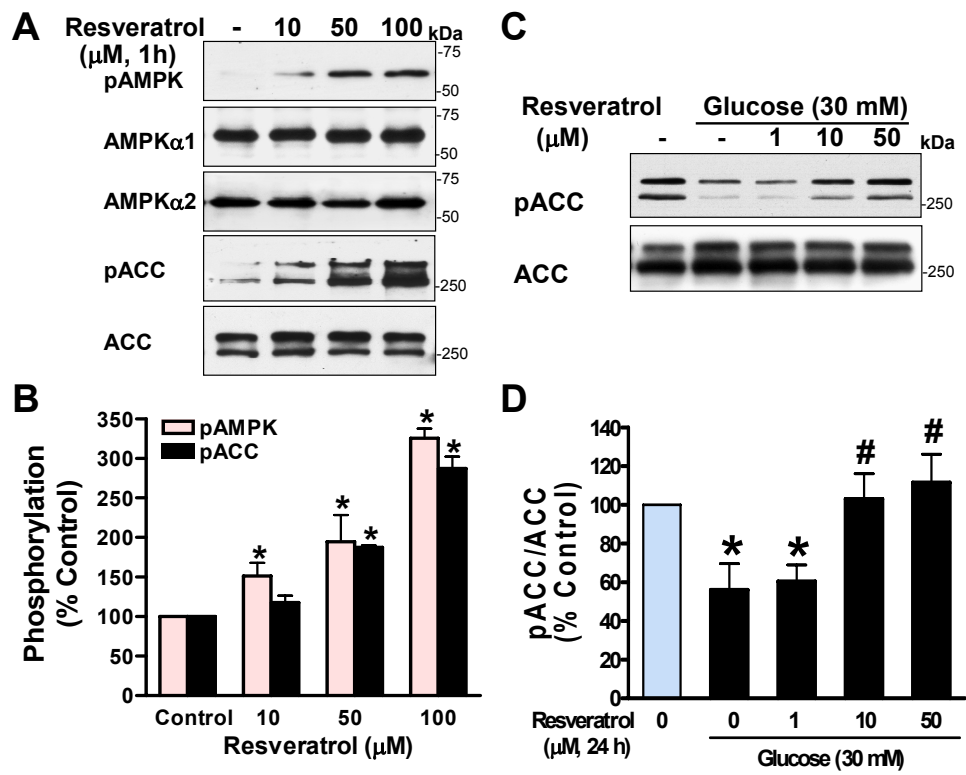

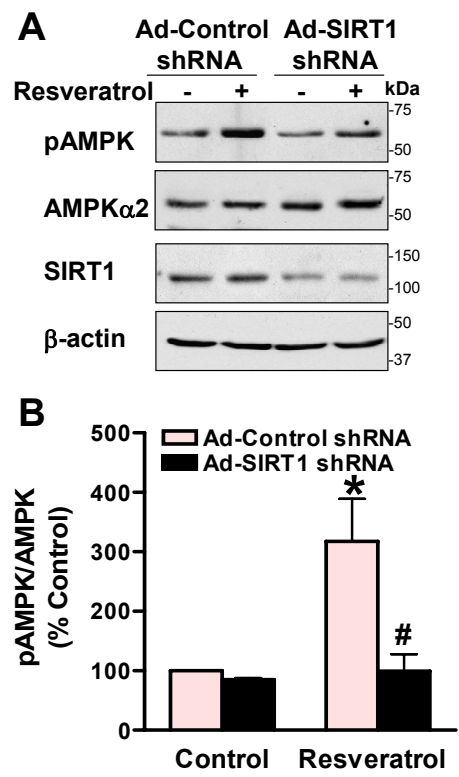

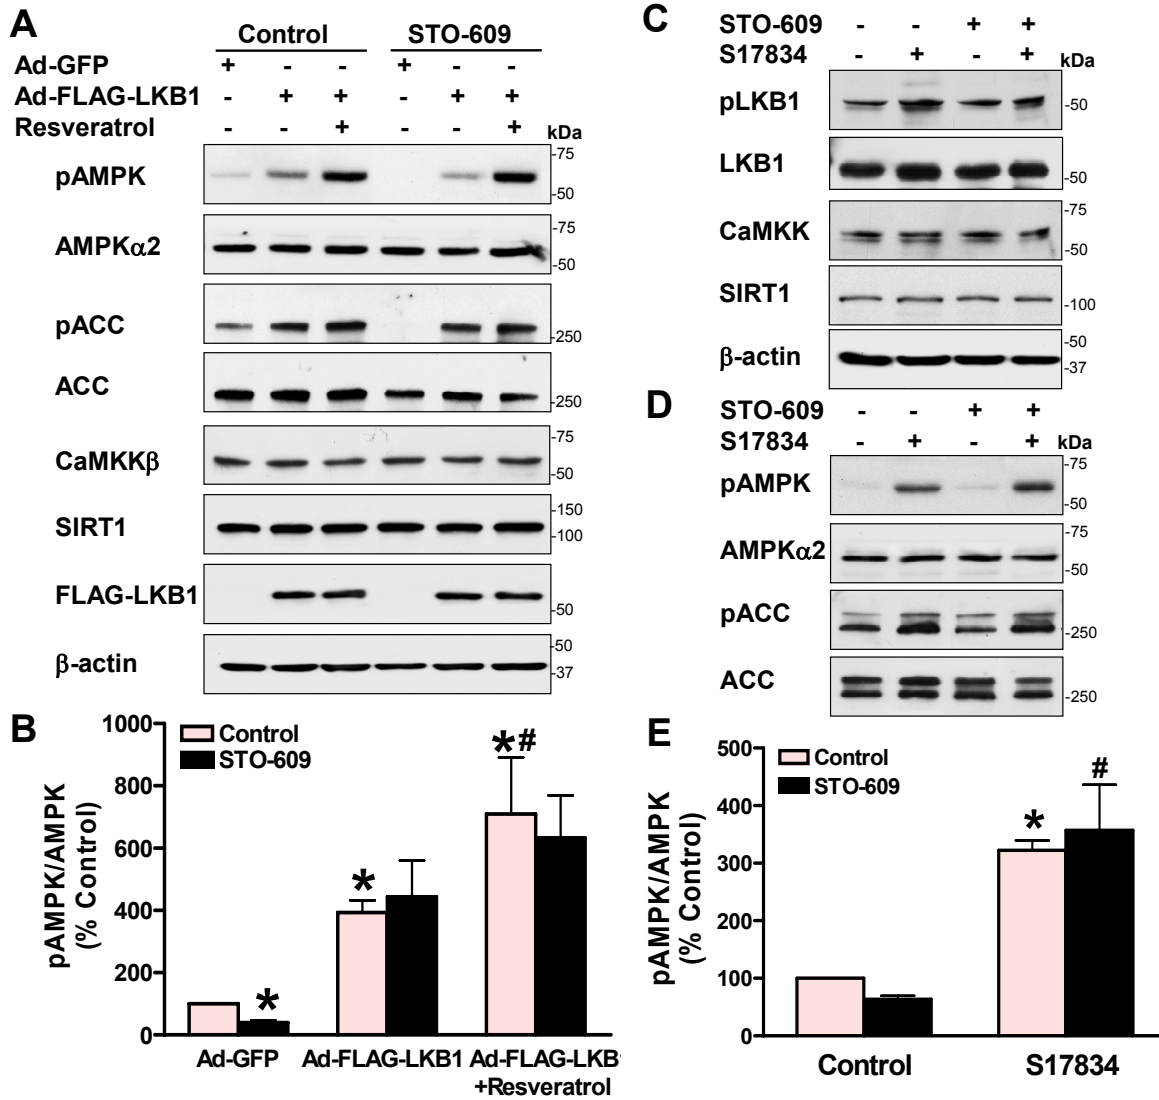

Supplement: M802187200_1.pdf [file M802187200_1.pdf]
